# Supplementary material
Source: ML conference proceedings conference paper supplement (https://proceedings.neurips.cc/paper_files/paper/2013/hash/ae5e3ce40e0404a45ecacaaf05e5f735-Abstract.html)
Supplement: Supplementary file [file ae5e3ce40e0404a45ecacaaf05e5f735-Supplemental.zip]

---

# Statistical analysis of coupled time series with Kernel Cross-Spectral Density operators.

## Supplementary information

---

Michel Besserve<sup>\*,†</sup>   Nikos K. Logothetis<sup>†</sup>   Bernhard Schölkopf<sup>\*</sup>

\* Max Planck Institute for Intelligent Systems; † Max Planck Institute for Biological Cybernetics  
Tübingen, Germany

### Proof of Lemma 3

Using the expression of the quadricumulant of centered variables, we show for any functions  $f_1, f_3 \in \mathcal{H}_1$  and  $f_2, f_4 \in \mathcal{H}_2$ .

$$\begin{aligned} \langle f_1 \otimes f_2^*, (\mathcal{K}_{1,2,3,4})(f_3 \otimes f_4^*) \rangle &= \text{Cum}(f_1(X_1), f_2(X_2), f_3(X_3), f_4(X_4)) \\ &= \mathbb{E}(\langle X_1 \otimes X_2^*, f_1 \otimes f_2^* \rangle \langle f_3 \otimes f_4^*, X_3 \otimes X_4^* \rangle) \\ &- \langle \mathbf{C}_{12}, f_1 \otimes f_2^* \rangle \langle \mathbf{C}_{34}, f_3 \otimes f_4^* \rangle - \langle \mathbf{C}_{13}, f_1 \otimes f_3^* \rangle \langle \mathbf{C}_{24}, f_2 \otimes f_4^* \rangle - \langle \mathbf{C}_{14}, f_1 \otimes f_4^* \rangle \langle \mathbf{C}_{23}, f_2 \otimes f_3^* \rangle \end{aligned}$$

Then we apply this formula to the scalar product by using two orthonormal systems  $\{\alpha_i\}$  and  $\{\beta_j\}$  of  $\mathcal{H}_1$  and  $\mathcal{H}_2$  respectively

$$\begin{aligned} \mathbb{E}[\langle X_1, X_3 \rangle \langle X_2, X_4 \rangle] &= \mathbb{E}[\langle X_1 \otimes X_2^*, X_3 \otimes X_4^* \rangle] = \mathbb{E}[\sum_{i,j} \langle X_1 \otimes X_2^*, \alpha_i \otimes \beta_j^* \rangle \langle X_3 \otimes X_4^*, \alpha_i \otimes \beta_j^* \rangle] \\ &= \sum_{i,j} \langle \alpha_i \otimes \beta_j^*, (\mathcal{K}_{1,2,3,4})(\alpha_i \otimes \beta_j^*) \rangle + \sum_{i,j} \langle \alpha_i \otimes \beta_j^*, \mathbf{C}_{1,2} \rangle \langle \alpha_i \otimes \beta_j^*, \mathbf{C}_{3,4} \rangle \\ &+ \sum_{i,j} \langle \alpha_i \otimes \alpha_j^*, \mathbf{C}_{1,3} \rangle \langle \beta_i \otimes \beta_j^*, \mathbf{C}_{2,4} \rangle + \sum_{i,j} \langle \alpha_i \otimes \beta_j^*, \mathbf{C}_{1,4} \rangle \langle \beta_i \otimes \alpha_j^*, \mathbf{C}_{2,3} \rangle \\ &= \text{Tr } \mathcal{K}_{1,2,3,4} + \langle \mathbf{C}_{1,2}, \mathbf{C}_{3,4} \rangle + \text{Tr } \mathbf{C}_{1,3} \text{Tr } \mathbf{C}_{2,4} + \langle \mathbf{C}_{1,4}, \mathbf{C}_{3,2} \rangle \end{aligned}$$

### Proof of Lemma 4

We prove this lemma for  $k > 0$  (the alternative case is similar):

$$|\sum_t w_T(t+k)w(t) - \sum_t w_T(t)^2| \leq \sum_t |w(t)| |\sum_{p=0}^{k-1} w(t+p+1) - w(t+p)|.$$

Using successively the bounded and bounded variation properties we get:

$$|\sum_t w_T(t+k)w(t) - \sum_t w_T(t)^2| \leq (\sup_t |w(t)|) \sum_{p=0}^{k-1} \sum_t |w(t+p+1) - w(t+p)| \leq C|k|$$

### Riemann-Lebesgue Lemma

The following lemma is introduced to prove Theorem 6

**Lemma 10.** [Variant of the Riemann-Lebesgue Lemma] For  $\nu \neq 0(\text{mod } 1)$ , and  $w$  Lebesgue integrable  $1/T \sum_{t \in \mathbb{Z}} w(k/T) \exp(-2i\pi\nu k) \xrightarrow{T \rightarrow \infty} 0$

*Proof.* Let us choose  $\epsilon$  arbitrary small. According to the Riemann-Lebesgue Lemma, for  $T > T_0$

$$|\int_{\mathbb{R}} w(t) \exp(-2i\pi\nu tT) dt| < \epsilon/2$$

Moreover, we can choose  $T > T_1$  such that the piece-wise constant function  $p_T(t) = w(k/T)$ ,  $k/T \leq t < (k+1)/T$  verifies  $\int |p_T(t) - w(t)| dt < \epsilon/2$  then

$$\left| \int (p_T(t) - w(t)) \exp(-2i\pi\nu t T) dt \right| < \int |p_T(t) - w(t)| < \epsilon/2$$

And thus,  $\left| \int p_T(t) \exp(-2i\pi\nu t T) dt \right| < \epsilon$ ,

This proves that  $\sum_{k=-\infty}^{+\infty} w(k/T) \int_{k/T}^{(k+1)/T} \exp(-2i\pi\nu t T) dt \rightarrow 0$  Which is equivalent to

$$1/T \sum_{k=-\infty}^{+\infty} w(k/T) (\exp(-2i\pi\nu k) - \exp(-2i\pi\nu(k+1))) \rightarrow 0$$

by dividing by  $(1 - \exp(-2i\pi\nu))$  we get the result

$$1/T \sum_k w(k/T) \exp(-2i\pi\nu k) \rightarrow 0$$

□

### Proof of Theorem 6

We assume that the population mean elements are used for centering (the case where empirical mean elements are used instead is asymptotically equivalent):

$$\begin{aligned} T^{-2} \mathbb{E} \left\| \sum_{k \in \mathbb{Z}} w_T(k) \mathbf{X}_1^c(k) z^{-k} \right\|^2 \left\| \sum_{n \in \mathbb{Z}} w_T(n) \mathbf{X}_2^c(n) z^{-n} \right\|^2 = \\ \sum_{k, n, k', n'} w_T(k) w_T(n) w_T(k') w_T(n') z^{+k-n-k'+n'} \left[ \langle \mathbf{C}_{12}(k-n), \mathbf{C}_{12}(k'-n') \rangle \dots \right. \\ \left. + \langle \mathbf{C}_{12}(k-n'), \mathbf{C}_{12}(k'-n) \rangle + \text{Tr}(\mathbf{C}_{11}(k-k')) \text{Tr}(\mathbf{C}_{22}(n-n')) + \text{Tr}(\mathbf{K}(n-k, k'-k, n'-k)) \right] \end{aligned}$$

We focus on the first term of the sum: as  $T$  grows,

$$T^{-2} \sum_{k, n, k', n'} w_T(k) w_T(n) w_T(k') w_T(n') z^{+k-n-k'+n'} \langle \mathbf{C}_{12}(k-n), \mathbf{C}_{12}(k'-n') \rangle$$

is arbitrary close to (using lemma 4 and  $\sum_{k \in \mathbb{Z}} |k| \|\mathbf{C}_{12}(k)\|_{\text{HS}} < +\infty$ )

$$T^{-2} \sum_{k, \delta, k', \delta'} w_T(k)^2 w_T(k')^2 z^{+\delta-\delta'} \langle \mathbf{C}_{12}(\delta), \mathbf{C}_{12}(\delta') \rangle \xrightarrow{T \rightarrow +\infty} \|w\|^4 \|\mathbf{S}_{12}(z)\|_{\text{HS}}^2$$

For the second term of the sum: as  $T$  grows

$$T^{-2} \sum_{k, n, k', n'} w_T(k) w_T(n) w_T(k') w_T(n') z^{+k-n-k'+n'} \langle \mathbf{C}_{12}(k-n'), \mathbf{C}_{12}(k'-n) \rangle$$

Due to the bounded variation of  $w$ , it is arbitrary close to

$$T^{-2} \sum_{k, k'} w_T(k)^2 w_T(k')^2 z^{+2k-2k'} \langle \sum_{\delta} \mathbf{C}_{12}(\delta) z^{-\delta}, \sum_{\delta'} \mathbf{C}_{12}(\delta') z^{-\delta'} \rangle \xrightarrow{T \rightarrow +\infty} 0$$

(the limit is computed using Lemma 10).

For the third term of the sum: as  $T$  grows

$$T^{-2} \sum_{k, n, k', n'} w_T(k) w_T(n) w_T(k') w_T(n') z^{+k-n-k'+n'} \text{Tr}(\mathbf{C}_{11}(k-k')) \text{Tr}(\mathbf{C}_{22}(n-n'))$$

is arbitrary close to (using lemma 5 and  $\sum_{k=-\infty}^{+\infty} |k| \text{Tr}(\mathbf{C}_{ii}(k)) < +\infty$ )

$$T^{-2} \sum_{k, \delta, k', \delta'} w_T(k')^2 w_T(n')^2 z^{+\delta-\delta'} \text{Tr}(\mathbf{C}_{11}(\delta) \text{Tr}(\mathbf{C}_{22}(\delta'))) \xrightarrow{T \rightarrow +\infty} \|w\|^4 \text{Tr}(\mathbf{S}_{11}(z)) \text{Tr}(\mathbf{S}_{22}(z))$$

Finally the last term vanishes using the assumption  $\sum_{k, i, j=-\infty}^{+\infty} |\text{Tr}[\mathbf{K}_{1212}(k, i, j)]| < +\infty$ . □
